# Supplementary material for: Differentiation of mouse fetal lung alveolar progenitors in serum-free organotypic cultures
Source: eLife. 2021 Sep 29;10:e65811. doi: 10.7554/eLife.65811 (PMC8480975; doi:10.7554/eLife.65811)
Supplement: Figure 1—figure supplement 1—source data 1. [file elife-65811-fig1-figsupp1-data1.xlsx]

## Sheet: Suppl. Fig. 1B
Figure 1 - Figure Supplement 1B - Normalized expression values of epithelial, mesenchymal and endothelial markers
Genes	E18.5	E18.5	D9	D9	D9	D9
Epcam	1.06144	0.938561	1.01292	0.831347	1.30452	1.3909
Pdgfra	1.02685	0.973147	0.356193	0.207435	0.315504	0.283856
Pecam1	0.976611	1.02339	0.0377692	0.0939707	0.0380319	0.0591637
