# Supplementary material for: Differentiation of mouse fetal lung alveolar progenitors in serum-free organotypic cultures
Source: eLife. 2021 Sep 29;10:e65811. doi: 10.7554/eLife.65811 (PMC8480975; doi:10.7554/eLife.65811)
Supplement: Figure 1—source data 1. [file elife-65811-fig1-data1.xlsx]

## Sheet: Fig. 1B
Figure 1B - Organoid forming efficiency counts, fresh vs. frozen tissue
total wells	formed (fresh)	% (fresh)	formed (frozen)	% (frozen)
40	31	77.5	20	50
40	30	75	21	52.5
40	30	75	22	55

## Sheet: Fig. 1E
Figure 1E - Normalized expression values of progenitor markers
Genes	E13.5	E13.5	E13.5	Day 0	Day 0	Day 0	Day 2	Day 2	Day 2	Day 6	Day 6	Day 6
Sox9	1	1.07433	0.953387	1.03347	1.11729	1.02845	0.977725	1.01339	1.35896	0.386221	0.311003	0.381565
Sox2	1.04285	0.90158	1.05557	2.12215	0.478147	1.34523	0.25936	0.27894	0.294462	0.195878	0.192847	0.176841
Bmp4	1.04985	1.07191	0.878238	2.58504	1.5968	1.99583	7.87721	4.33997	6.24357	0.794261	0.657555	0.755333
Id2	1.1318	0.828528	1.03967	3.92753	0.668326	1.54779	3.65817	2.05783	2.44624	0.241672	0.299084	0.401542
Etv5	1.11121	1.15439	0.734397	5.84472	1.82403	2.45339	0.687596	0.408847	0.744267	0.318559	0.209081	0.115995
