# Supplementary material for: Differentiation of mouse fetal lung alveolar progenitors in serum-free organotypic cultures
Source: eLife. 2021 Sep 29;10:e65811. doi: 10.7554/eLife.65811 (PMC8480975; doi:10.7554/eLife.65811)
Supplement: Figure 2—source data 1. [file elife-65811-fig2-data1.xlsx]

## Sheet: Fig. 2B
Figure 2B - Counts of alveolar cell types in organoid culture, Matrigel vs. Collagen
Matrigel
total	Bipotent	% Bipotent	AT1	% AT1	AT2	% AT2
35	30	85.7143	5	14.2857	0	0
34	32	94.1176	1	2.94118	1	2.94118
30	27	90	3	10	0	0
Matrigel : Collagen (1:1)
total	Bipotent	% Bipotent	AT1	% AT1	AT2	% AT2
30	16	53.3333	13	43.3333	1	3.33333
33	16	48.4848	16	48.4848	1	3.0303
20	12	60	8	40	0	0
Matrigel : Collagen (1:3)
total	Bipotent	% Bipotent	AT1	% AT1	AT2	% AT2
30	19	63.3333	10	33.3333	1	3.33333
23	13	56.5217	10	43.4783	0	0
30	14	46.6667	15	50	1	3.33333

## Sheet: Fig. 2C
Figure 2C - Normalized expression values of alveolar markers
Genes	Day 0	Day 0	Day 0	Day 2	Day 2	Day 2	Day 6	Day 6	Day 6	E18.5	E18.5	E18.5
Pdpn	1.17637	1.03121	0.792421	3.49269	2.95742	3.14447	3.76941	4.21152	6.47257	6.51759	5.22105	5.32565
Hopx	0.360624	1.64555	0.993828	3.57036	3.60767	3.44227	14.4307	18.2341	17.3104	19.1407	18.0768	17.5479
Aqp5	0.849538	1.22243	0.928034	7.84759	9.72872	8.54558	178.187	84.1417	132.951	251.558	266.363	244.564
Ager	1.59482	1.22552	0.754468	7.96343	5.32725	6.44513	36.0866	36.0866	42.3236	69.7147	58.2179	54.5489
Akap5	1.25878	1.26753	0.473692	1.2075	1.11113	1.33526	6.1136	5.98778	5.47182	5.47182	5.66479	5.33546
Abca3	0.884367	1.46323	1.34411	8.55432	11.4848	9.45223	5.92433	8.22008	6.53937	20.4518	23.7796	21.4454
Sftpc	0.258877	1.51607	1.22505	4.46246	7.14949	6.44389	11.2577	6.99023	20.1868	30.7037	35.948	29.6572
Lyz2	2.07209	0.532587	0.395319	4.9283	3.97537	3.89556	14.0363	8.28838	3.41312	33.8501	37.042	29.4452
Atf3	1.03643	1.67206	0.291511	0.591162	1.33943	1.30552	4.14572	4.17456	6.55059	1.92565	1.73102	2.44556
Scnn1a	1.05355	1.27038	0.676075	1.99343	1.40957	1.66538	16.3958	15.1922	16.6247	41.5062	52.1739	42.5547
Muc1	1.44577	1.0806	0.473631	3.12063	4.00509	3.65535	8.46691	7.6308	7.6308	8.88785	8.23538	8.11343
