# Supplementary material for: Differentiation of mouse fetal lung alveolar progenitors in serum-free organotypic cultures
Source: eLife. 2021 Sep 29;10:e65811. doi: 10.7554/eLife.65811 (PMC8480975; doi:10.7554/eLife.65811)
Supplement: Figure 3—source data 1. [file elife-65811-fig3-data1.xlsx]

## Sheet: Fig. 3C absolute counts
Figure 3C - Counts of alveolar cell types in the WNT modulators screen
Drug ID	Drug Name	Target	Information	Replica 1							Replica 2							Replica 3							Replica 4										Average	BP		AT1		AT2
				Total cells	BP	BP (%)	AT1	AT1 (%)	AT2	AT2 (%)	Total cells	BP	BP (%)	AT1	AT1 (%)	AT2	AT2 (%)	Total cells	BP	BP (%)	AT1	AT1 (%)	AT2	AT2 (%)	Total cells	BP	BP (%)	AT1	AT1 (%)	AT2	AT2 (%)				Total cells	St.dev	Percentage	St.dev	Percentage	St.dev	Percentage
	DMSO		Control	17	8	47.0588	7	41.1765	2	11.7647	21	9	42.8571	11	52.381	1	4.7619	20	8	40	11	55	1	5	28	9	32.1429	19	67.8571	0	0				86	6.28928	40.5147	10.9551	54.1036	4.83857	5.38165
A7-III	Emodin	Autophagy;Casein Kinase;Casein Kinase	Emodin is a broad-spectrum anticancer agent. Emodin inhibits casein kinase II (CKII) activity with IC50 of 2 μM. IC50 & Target: IC50: 2 μM (CKII)[1] In Vitro: Emodin, an anthraquinone derivative, selectively inhibits casein kinase II(CKII), a Ser/Thr kinase, as a competitive inhibitor. Emodin inhibits CKII activity with IC50 of 2 μM, which is two to three orders of magnitude lower than those agai…	23	13	56.5217	10	43.4783	0	0	15	7	46.6667	8	53.3333	0	0	20	9	45	10	50	1	5	23	13	56.5217	9	39.1304	1	4.34783				81	6.20835	51.1775	6.3871	46.4855	2.71159	2.33696
B5-III	TTP 22	Casein Kinase;Casein Kinase	TTP 22 is a high affinity, ATP-competitive casein kinase 2 (CK2) inhibitor with IC50/Ki of 0.1 uM/40 nM; shows selectivity for CK2 over JNK3, ROCK1, and MET(IC50> 10 uM). IC50 Value: 0.1 uM Target: CK2 TTP 22 shows selectivity for CK2 over JNK3, ROCK1, and MET (inhibitory effects displayed at greater than 10 μM). TTP 22 is highly conserved serine/threonine protein kinase that is also involved in …	28	11	39.2857	14	50	3	10.7143	23	8	34.7826	15	65.2174	0	0	20	11	55	9	45	0	0	35	19	54.2857	16	45.7143	0	0				106	10.3354	45.8385	9.41878	51.4829	5.35714	2.67857
B9-I	TDZD-8	GSK-3;GSK-3	TDZD-8 is an inhibitor of GSK-3β, with an IC50 of 2 μM; shows less potent activities against Cdk-1/cyclin B, CK-II, PKA, and PKC, with all IC50s of >100 μM. IC50 & Target: IC50: 2 μM (GSK-3β)[1] In Vitro: TDZD8 results in a significant decline of cellular ATP levels in PC-3 cells. TDZD8 (10 μM) treatment also triggers a drastic autophagy response and AMPK activation in PC-3 cells. Furthermore, TD…	22	5	22.7273	15	68.1818	2	9.09091	17	11	64.7059	5	29.4118	1	5.88235	28	10	35.7143	16	57.1429	2	7.14286	22	7	31.8182	12	54.5455	3	13.6364				89	18.1448	38.7414	16.3768	52.3205	3.3989	8.93812
B10-I	AR-A014418	GSK-3;GSK-3	AR-A014418 is a selective and effective GSK3β inhibitor with an IC50 value of 104 nM, and has no significant inhibition on 26 other kinases. IC50 & Target: IC50: 104 nM (GSK3β)[1] In Vitro: AR-A014418 inhibits tau phosphorylation at a GSK3-specific site (Ser-396) in 3T3 fibroblasts expressing human four-repeat tau protein with IC50 of 2.7 μM, and protects cultured N2A cells from death induced by …	15	7	46.6667	7	46.6667	1	6.66667	35	12	34.2857	23	65.7143	0	0	32	10	31.25	20	62.5	2	6.25	28	11	39.2857	17	60.7143	0	0				110	6.73442	37.872	8.4131	58.8988	3.7326	3.22917
D11-I	TWS119	GSK-3;GSK-3;Autophagy	TWS119 is a specific inhibitor of GSK-3β, with an IC50 of 30 nM, and activates the wnt/β-catenin pathway. IC50 & Target: IC50: 30 nM (GSK-3β)[1] In Vitro: TWS119 induces neuronal differentiation in P19 EC cells and primary mouse ESCs. TWS119 binds to GSK-3β with KD of 126 nM, and modulates the activity of the complex, triggering downstream transcriptional events that lead the neuronal induction[1…	25	4	16	21	84	0	0	19	6	31.5789	13	68.4211	0	0	19	7	36.8421	12	63.1579	0	0	17	2	11.7647	15	88.2353	0	0				80	12.0562	24.0464	12.0562	75.9536	0	0
F11-I	IM-12	GSK-3;GSK-3	IM-12 is an inhibitor of GSK-3β, with an IC50 of 53 nM, and also enhances Wnt signalling. IC50 & Target: IC50: 53 nM (GSK-3β)[1] In Vitro: IM-12 inhibits GSK-3β in ReNcell VM cells, with I50 of 3.8 μM. IM-12 (3 μM) enhances the β-catenin amount, with no further effect at lower or higher concentration. IM-12 (3 μM) also attenuates the proliferation of ReNCell VM cells. IM-12 increases TCF-activity…	16	5	31.25	11	68.75	0	0	38	9	23.6842	28	73.6842	1	2.63158	25	9	36	15	60	1	4	23	7	30.4348	14	60.8696	2	8.69565				102	5.07189	30.3422	6.5526	65.8259	3.64274	3.83181
A11-II	Tideglusib	GSK-3;GSK-3	Tideglusib is an irreversible GSK-3 inhibitor with IC50 of 5 nM and 60 nM for GSK-3βWT (1 h preincubation) and GSK-3βC199A (1 h preincubation), respectively. IC50 & Target: IC50: 5 nM (GSK-3βWT), 60 nM (GSK-3βC199A)[1] In Vitro: Tideglusib (NP12) is a small heterocyclic thiadiazolidinone (TDZD) derivative, which is an ATP-non competitive inhibitor of GSK-3β with an IC50 value in the micromolar ra…	22	12	54.5455	10	45.4545	0	0	38	21	55.2632	17	44.7368	0	0	29	15	51.7241	14	48.2759	0	0	26	11	42.3077	14	53.8462	1	3.84615				115	5.9671	50.9601	4.1375	48.0784	1.92308	0.961538
B3-II	Bikinin	GSK-3;GSK-3	Bikinin is a non-steroidal, ATP-competitive inhibitor of plant GSK-3/Shaggy-like kinases and activates BR (brassinosteroids) signaling. IC50 & Target: GSK-3[1] In Vitro: Bikinin reduces transcript levels of NbRBOHB and BR-induced NbRBOHB expression in TRV:00, TRV:NbDWARF, TRV:NbBRI1, TRV:NbBSK1, TRV:NbBAK1, TRV:NbBIK1 and TRV:NbBSU1 plants. Bikinin largely inhibits BR-increased ROS accumulation. …	22	11	50	11	50	0	0	20	10	50	10	50	0	0	21	8	38.0952	12	57.1429	1	4.7619	24	13	54.1667	11	45.8333	0	0				87	6.93097	48.0655	4.69635	50.744	2.38095	1.19048
E8-I	WAY-262611	β-catenin	WAY-262611 is a wingless β-Catenin agonist that increases bone formation rate with an EC50 of 0.63 μM in TCF-Luciferase assay. IC50 & Target: EC50: 0.63 μM (β-Catenin)[1] In Vitro: WAY-262611 has the most potent activity in the primary assay, low kinase inhibition potential, and high solubility[1]. In Vivo: WAY-262611 has excellent pharmacokinetic properties and shows a dose dependent increase in…	19	11	57.8947	8	42.1053	0	0	26	10	38.4615	16	61.5385	0	0	17	7	41.1765	9	52.9412	1	5.88235	22	10	45.4545	11	50	1	4.54545				84	8.59497	45.7468	8.02648	51.6462	3.05933	2.60695
F3-I	PNU-74654	β-catenin;Wnt	PNU-74654 is an inhibitor of Wnt/β-catenin pathway with an IC50 of 129.8 μM in NCI-H295 cell. IC50 & Target: 129.8 μM (Wnt/β-catenin, NCI-H295 cell)[1] In Vitro: PNU-74654 binds to β-catenin with a KD of 450 nM. The Tcf3/Tcf4-binding surface on β-catenin contains a well-defined hot spot around residues K435 and R469. The binding mode of PNU-74654 involves the two narrow pockets on either side of …	11	4	36.3636	6	54.5455	1	9.09091	18	5	27.7778	12	66.6667	1	5.55556	20	6	30	11	55	3	15	28	6	21.4286	20	71.4286	2	7.14286				77	6.16434	28.8925	8.46982	61.9102	4.1298	9.19733
H5-I	Cardiogenol C (hydrochloride)	β-catenin;Wnt	Cardiogenol C hydrochloride is a cell-permeable pyrimidine compound which potently induces the differentiation of ESCs into cardiomyocytes (EC50= 100 nM). IC50 value: 100 nM (EC50) Target: in vitro: Cardiogenol C hydrochloride is a cardiomyogenesis inducer in embryonic stem cells. Cardiogenol C induces the differentiation of myosin heavy chain-positive cardiomyocytes from embryonic stem cells wit…	33	17	51.5152	13	39.3939	3	9.09091	31	9	29.0323	21	67.7419	1	3.22581	25	10	40	15	60	0	0	33	11	33.3333	22	66.6667	0	0				122	9.7975	38.4702	13.1579	58.4506	4.28661	3.07918
C4-I	XAV-939	PARP;PARP;β-catenin	XAV-939 is a selective Wnt pathway β-catenin-mediated transcription inhibitor and axin stabilizing agent with IC50 values of 11 and 4 nM for the inhibition of TNKS1 and TNKS2, respectively. IC50 & Target: IC50: 11 nM (TNKS1), 4 nM (TNKS2) In Vitro: XAV939 (1 μM) strongly inhibis STF activity in SW480 cells, Wnt3a-stimulated STF activity in HEK293 cells, but does not affect CRE, NF-κB or TGF-β luc…	23	10	43.4783	10	43.4783	3	13.0435	16	8	50	7	43.75	1	6.25	41	17	41.4634	21	51.2195	3	7.31707	20	10	50	9	45	1	5				100	4.4241	46.2354	3.63266	45.8619	3.55564	7.90264
C6-II	WIKI4	β-catenin	WIKI4 is a potent inhibitor of Wnt/β-catenin signaling (EC50 ~ 75 nM); inhibits auto-ADP-ribosylation of tankyrase 2 (TNKS2) (IC50 ~15 nM).	45	21	46.6667	20	44.4444	4	8.88889	44	23	52.2727	18	40.9091	3	6.81818	26	15	57.6923	11	42.3077	0	0	33	17	51.5152	16	48.4848	0	0				148	4.51482	52.0367	3.30271	44.0365	4.61237	3.92677
F10-II	Nefopam (hydrochloride)	β-catenin	Nefopam is a centrally-acting but non-opioid analgesic drug, for the relief of moderate to severe pain.	17	7	41.1765	10	58.8235	0	0	29	14	48.2759	15	51.7241	0	0	21	9	42.8571	12	57.1429	0	0	15	7	46.6667	8	53.3333	0	0				82	3.28929	44.744	3.28929	55.256	0	0
G11-II	KYA1797K	β-catenin;Wnt	KYA1797K is a potent and selective Wnt/β-catenin inhibitor with an IC50 of 0.75 µM. IC50 & Target: IC50: 0.75 (Wnt/β-catenin)[1] In Vitro: KYA1797K binds directly to the regulators of G-protein signaling domain of axin, initiating b-catenin and Ras degradation through enhancement of the b-catenin destruction complex activating GSK3b. KYA1797K effectively suppresses the growth of CRCs harboring AP…	23	8	34.7826	15	65.2174	0	0	39	19	48.7179	19	48.7179	1	2.5641	25	9	36	16	64	0	0	44	19	43.1818	25	56.8182	0	0				131	6.52045	40.6706	7.61027	58.6884	1.28205	0.641026
H2-II	Berberine (chloride hydrate)	β-catenin;Autophagy;Wnt	Berberine has shown to be effective in inhibiting cell proliferation and promoting apoptosis in various cancerous cells; MAPK and Wnt/β-catenin pathways affected by Berberine. IC50 value: Target: Anticancer agent The plant-based alkaloid berberine has potential therapeutic applications for breast cancer, although a better understanding of the genes and cellular pathways regulated by this compound…	22	12	54.5455	10	45.4545	0	0	32	2	6.25	30	93.75	0	0	28	3	10.7143	25	89.2857	0	0	24	2	8.33333	22	91.6667	0	0				106	23.1285	19.9608	23.1285	80.0392	0	0
H11-II	Pamidronic acid	β-catenin;Wnt	Pamidronic acid is a drug used to treat a broad spectrum of bone absorption diseases. IC50 & Target: Wnt, β-catenin[1] In Vitro: Osteosarcoma cell viability decreases significantly in a concentration- and time-dependent manner at pamidronate concentrations ranging from 100 to 1000 μM, most consistently after 48 and 72 hours' exposure. In treated osteosarcoma cells, the lowest percentage cell viab…	24	10	41.6667	13	54.1667	1	4.16667	35	17	48.5714	18	51.4286	0	0	14	8	57.1429	6	42.8571	0	0	21	9	42.8571	12	57.1429	0	0				94	7.06405	47.5595	6.15403	51.3988	2.08333	1.04167
C10-I	Wnt-C59	Porcupine;Wnt	Wnt-C59 is a potent PORCN enzymatic activity and Wnt inhibitor. IC50 & Target: PORCN[1] Wnt[2] In Vitro: Wnt-C59 (C59) inhibits PORCN activity at nanomolar concentrations, as assessed by inhibition of Wnt palmitoylation, Wnt interaction with the carrier protein Wntless/WLS, Wnt secretion, and Wnt activation of β-catenin reporter activity. Wnt-C59 inhibits WNT3A-mediated activation of a multimeriz…	43	15	34.8837	27	62.7907	1	2.32558	36	16	44.4444	18	50	2	5.55556	35	14	40	20	57.1429	1	2.85714	25	12	48	13	52	0	0				139	5.67168	41.832	5.72574	55.4834	2.28094	2.68457
D10-I	KY02111	Wnt	KY02111 is a small molecule which can promote differentiation of hPSCs to cardiomyocytes. IC50 value: Target: Wnt signaling inhibitor KY02111 Induces downregulation of Wnt signaling target genes; inhibits canonical Wnt signaling in a manner distinct from other known Wnt inhibitors. KY02111 (10 μM) increases the ratio of beating cardiac colonies as much as 70%-94% in cell aggregates of two hESC li…	17	7	41.1765	9	52.9412	1	5.88235	11	5	45.4545	6	54.5455	0	0	22	5	22.7273	14	63.6364	3	13.6364	19	9	47.3684	9	47.3684	1	5.26316				69	11.2709	39.1817	6.75041	54.6229	5.61896	6.19547
H10-I	iCRT 14	Wnt	iCRT 14 is a novel potent inhibitor of β-catenin-responsive transcription (CRT), with IC50 of 40.3 nM against Wnt responsive STF16 luciferase. IC50 & Target: IC50: 40.3 nM (Wnt responsive STF16 luciferase)[1] In Vitro: iCRT14 can interfere with TCF binding to DNA in addition to its ability to influence TCF-β-cat interaction[1]. iCRT14 (10, 25, 50 μM) effectively inhibits cell proliferation in BT-…	48	17	35.4167	31	64.5833	0	0	29	19	65.5172	10	34.4828	0	0	22	17	77.2727	5	22.7273	0	0	34	12	35.2941	22	64.7059	0	0				133	21.3538	53.3752	21.3538	46.6248	0	0
D4-II	ETC-159	Wnt	ETC-159 is a potent, orally available PORCN inhibitor. It inhibits β-catenin reporter activity with an IC50 of 2.9 nM. IC50 & Target: IC50: 2.9 nM (β-catenin)[1] In Vitro: ETC-159 blocks the secretion and activity of all Wnts. ETC-159 has robust activity in multiple cancer models driven by high Wnt signaling. ETC-159 is highly efficacious in molecularly defined colorectal cancers (CRCs) with R-sp…	17	6	35.2941	11	64.7059	0	0	13	4	30.7692	9	69.2308	0	0	10	4	40	6	60	0	0	22	9	40.9091	12	54.5455	1	4.54545				62	4.68151	36.7431	6.30127	62.1205	2.27273	1.13636
F7-II	IWR-1	Wnt	IWR-1 is a Wnt pathway inhibitor with IC50 of 180 nM in L-cells expressing Wnt3A, and induces Axin2 protein levels and promotes β-catenin phosphorylation by stabilizing Axin-scaffolded destruction complexes. IC50 & Target: IC50: 180 nM (Wnt) In Vitro: Both IWR-1 and XAV939 act as reversible Wnt pathway inhibitors and exhibit similar pharmacological effects in vitro. IWR-1 exerts its effect via in…	27	11	40.7407	8	29.6296	8	29.6296	20	8	40	8	40	4	20	19	11	57.8947	8	42.1053	0	0	21	10	47.619	11	52.381	0	0				87	8.29649	46.5636	9.32791	41.029	14.8564	12.4074
G3-II	Hexachlorophene	Wnt;Potassium Channel	Hexachlorophene(Hexachlorofen) is a potent KCNQ1/KCNE1 potassium channel activator with EC50 of 4.61 ± 1.29 μM; also is an inhibitor of Wnt/beta-catenin signaling. IC50 value: 4.61 ± 1.29 μM(EC50) [1] Target: KCNQ1 activator in vitro: HCP potently increases the current amplitude of KCNQ1/KCNE1 expressed by stabilizing the channel in an open state with an EC(50) of 4.61 ± 1.29 μM. Further studies …	30	6	20	24	80	0	0	32	10	31.25	22	68.75	0	0	24	10	41.6667	14	58.3333	0	0	31	8	25.8065	23	74.1935	0	0				117	9.21687	29.6808	9.21687	70.3192	0	0
G9-II	iCRT3	Wnt	iCRT3 is an inhibitor of both Wnt and β-catenin-responsive transcription. IC50 & Target: Wnt[1], β-catenin-responsive transcription[2] In Vitro: iCRT3 significantly decreases TOP Flash activity and reduces the level of NTSR1. The anti-apoptotic effects of Neurotensin (NTS) and Wnt3a can be largely abrogated by iCRT3[1]. Cells maintained long term with iCRT3 show enhanced expression of classic plu…	22	10	45.4545	12	54.5455	0	0	22	8	36.3636	13	59.0909	1	4.54545	25	9	36	16	64	0	0	25	9	36	16	64	0	0				94	4.66981	38.4545	4.54273	60.4091	2.27273	1.13636
B7-III	JW74	PPAR;Wnt;PPAR	JW74 is an efficient and specific inhibitor of the canonical Wnt signaling. JW74 shows a reduction of canonical Wnt signaling in the ST-Luc assay with IC50 values of 790 nM. IC50 value: 790 nM Target: Wnt JW74 increases concentration of AXIN2 and decrease the active form of β-catenin in SW480 colorectal cancer cells. [2] The tankyrase-specific inhibitor JW74 affects cell cycle progression and ind…	31	11	35.4839	19	61.2903	1	3.22581	24	9	37.5	15	62.5	0	0	20	9	45	11	55	0	0	25	16	64	9	36	0	0				100	12.9977	45.496	12.2479	53.6976	1.6129	0.806452
D7-I	LGK974	Porcupine	LGK974 is a potent and specific Porcupine (PORCN) inhibitor, also potently inhibits Wnt signaling in the aforementioned Wnt coculture assay with IC50 of 0.4 nM. IC50 & Target: Porcupine[1] In Vitro: LGK974 effectively displaces [3H]-GNF-1331 with an IC50 of 1 nM in the PORCN radioligand binding assay. LGK974 potently reduces Wnt-dependent AXIN2 mRNA levels in HN30 cells with an IC50 of 0.3 nM[1].…	17	8	47.0588	9	52.9412	0	0	13	12	92.3077	1	7.69231	0	0	8	1	12.5	7	87.5	0	0	20	9	45	11	55	0	0				58	32.7993	49.2166	32.7993	50.7834	0	0
F11-II	IWP L6	Porcupine	IWP L6 is a Porcn inhibitor with EC50 of 0.5 nM. IC50 Value: 0.5 nM(EC50) [1] Target: Porcupine in vitro: IWP-L6 effectively suppressed the phosphorylation of dishevelled 2 (Dvl2) in HEK293 cells, a biochemical event associated with many Wnt-dependent cellular responses. IWP-L6 inhibits Wnt mediated branching morphogenesis in cultured embryonic kidneys [1]. in vivo: IWP-L6 is stable in human plas…	30	6	20	24	80	0	0	30	7	23.3333	19	63.3333	4	13.3333	27	15	55.5556	7	25.9259	5	18.5185	40	18	45	14	35	8	20				127	17.1256	35.9722	25.0187	51.0648	9.10237	12.963
F4-II	TA-01	p38 MAPK;Casein Kinase;Casein Kinase	TA-01 potently inhibits CK1ε, CK1δ,and p38α (IC50values are 6.4, 6.8, and 6.7 nM respectively). IC50 value: 6.4/6.8/6.7 nM Target: CK1ε/ CK1δ/p38α MAPK in vitro: TA-01 inhibitors inhibit cardiac development when applied at 5 μM. TA-01 shows an almost complete inhibition of cardiogenesis when applied at 5 μM. TA-01 shows reduced expression of all tested mesoderm markers and the pre-cardiac marker …	31	9	29.0323	18	58.0645	4	12.9032	20	15	75	4	20	1	5	23	15	65.2174	8	34.7826	0	0	39	18	46.1538	21	53.8462	0	0				113	20.4262	53.8509	17.6452	41.6733	6.09267	4.47581
C9-I	D4476	Autophagy;Casein Kinase;Casein Kinase	D4476 is a potent, selective and cell-permeable inhibitor of casein kinase 1(CK1) with an IC50 value of 0.3 μM in vitro. IC50 & Target: IC50: 0.3 μM (CK1)[1] In Vitro: D4476 is a potent and rather selective inhibitor of CK1 in vitro and in cells. In H4IIE hepatoma cells, D4476 specifically inhibits the phosphorylation of endogenous forkhead box transcription factor O1a (FOXO1a) on Ser322 and Ser3…	41	20	48.7805	21	51.2195	0	0	24	12	50	10	41.6667	2	8.33333	22	14	63.6364	7	31.8182	1	4.54545	31	24	77.4194	7	22.5806	0	0				118	13.4478	59.9591	12.3641	36.8213	4.02657	3.2197
F2-II	LF3	β-catenin	LF3 is an antagonist of the β-Catenin/TCF4 interaction with antitumor activity; has an IC50 of 1.65 μM. IC50 & Target: IC50: 1.65 μM (β-Catenin/TCF4, AlphaScreen), 1.82 μM (β-Catenin/TCF4, ELISA)[1] In Vitro: LF3 inhibits Wnt/β-catenin signals in cells with exogenous reporters and in colon cancer cells with endogenously high Wnt activity. LF3 also suppresses features of cancer cells related to Wn…	23	15	65.2174	7	30.4348	1	4.34783	28	16	57.1429	11	39.2857	1	3.57143	13	6	46.1538	5	38.4615	2	15.3846	24	13	54.1667	8	33.3333	3	12.5				88	7.87695	55.6702	4.21879	35.3788	5.89112	8.95097
E5-II	IWP-2	Wnt	IWP-2 is an inhibitor of Wnt processing and secretion with IC50 of 27 nM. IC50 & Target: IC50: 27 nM (Wnt)[1] In Vitro: IWP-2, an inhibitor of WNT processing and secretion. IWP-2 significantly enhances the anti-proliferative effect of LEF. It is also obvious that the combination of LEF and IWP-2 could minimize the expression of β-catenin, c-Myc, Cyclin D1, Bcl2 and Bax to the largest extent compa…	30	22	73.3333	8	26.6667	0	0	30	17	56.6667	13	43.3333	0	0	29	14	48.2759	15	51.7241	0	0	20	10	50	10	50	0	0				109	11.4307	57.069	11.4307	42.931	0	0
A8-I	CHIR-99021	GSK-3;GSK-3;Autophagy	CHIR-99021 trihydrochloride is a GSK-3α/β inhibitor with IC50 of 10 nM/6.7 nM; > 500-fold selectivity for GSK-3 versus its closest homologs CDC2 and ERK2, as well as other protein kinases. IC50 & Target: IC50: 10 nM/6.7 nM (GSK-3α/β)[1] In Vitro: CHIR 99021inhibits human GSK-3β with Ki values of 9.8 nM[1]. CHIR 99021 is a small organic molecule that inhibits GSK3α and GSK3β by competing for their…	29	18	62.069	11	37.931	0	0	22	13	59.0909	9	40.9091	0	0	22	15	68.1818	7	31.8182	0	0	20	14	70	6	30	0	0				93	5.11612	64.8354	5.11612	35.1646	0	0
C8-I	SB 216763	GSK-3;GSK-3;Autophagy	SB 216763 is potent and selective glycogen synthase kinase-3 (GSK-3) inhibitor, with IC50 value of 34.3 nM for GSK-3α and GSK-3β, respectively. IC50 & Target: IC50: 34.3 nM (GSK-3α), 34.3 nM (GSK-3β)[5] In Vitro: SB-216763 (10-20 µM) induces β-catenin mediated-transcription in a dose-dependent manner in HEK293 cells. SB-216763 (10, 15 and 20 µM) can maintain mESCs with a pluripotent-like morpholo…	34	32	94.1176	2	5.88235	0	0	30	26	86.6667	4	13.3333	0	0	25	18	72	7	28	0	0	32	18	56.25	14	43.75	0	0				121	16.7507	77.2586	16.7507	22.7414	0	0
B11-II	LY2090314	GSK-3;GSK-3	LY2090314 is a potent inhibitor of glycogen synthase kinase-3 (GSK-3) with IC50 values of 1.5 nM and 0.9 nM for GSK-3α and GSK-3β, respectively. IC50 & Target: IC50: 0.9 nM (GSK-3β), 1.5 nM (GSK-3α)[1] In Vitro: LY2090314 (20 nM) promotes a time-dependent stabilization of β-catenin total protein as well as an induction of Axin2. LY2090314 is highly selective towards GSK3 as demonstrated by its fo…	40	30	75	7	17.5	3	7.5	27	17	62.963	7	25.9259	3	11.1111	29	24	82.7586	3	10.3448	2	6.89655	32	19	59.375	10	31.25	3	9.375				128	10.8042	70.0241	9.21682	21.2552	1.91135	8.72067
C2-II	AZD2858	GSK-3;GSK-3	AZD2858 is a potent, orally active GSK-3 inhibitor, with IC50s of 0.9 and 5 nM for GSK-3α and GSK-3β, respectively, used in the research of fracture healing. IC50 & Target: IC50: 0.9 nM (GSK-3α), 5 nM (GSK-3β)[4] In Vitro: AZD2858 (1 μM) increases β-catenin levels after a short period of time in human osteoblast cells. AZD2858 inhibits GSK-3β dependent phosphorylation with an IC50 of 68 nM. AZD28…	28	22	78.5714	6	21.4286	0	0	30	22	73.3333	8	26.6667	0	0	50	40	80	6	12	4	8	33	24	72.7273	5	15.1515	4	12.1212				141	3.66671	76.158	6.54076	18.8117	6.04726	5.0303
A9-III	Wogonin	CDK;Autophagy;Wnt	Wogonin is a naturally occurring mono-flavonoid, can inhibit the activity of CDK8 and Wnt, and exhibits anti-inflammatory and anti-tumor effects. IC50 & Target: CDK8, Wnt[1], CDK4[2] In Vitro: Wogonin (0-200 μM) exhibits a dose- and time- dependent reduces in cell viability of caco-2, SW1116 and HCT116 cells. Wogonin (10-40 μM) induces G1 phase arrest in HCT-116 cells. Wogonin also supresses Wnt …	36	24	66.6667	10	27.7778	2	5.55556	16	11	68.75	5	31.25	0	0	25	13	52	12	48	0	0	21	16	76.1905	5	23.8095	0	0				98	10.1294	65.9018	10.6374	32.7093	2.77778	1.38889
F3-II	SB 415286	GSK-3;GSK-3	SB 415286 is a potent and selective cell permeable inhibitor of GSK-3α, with an IC50 of 77.5 nM, and a Ki of 30.75 nM. IC50 & Target: IC50: 77.5 nM (GSK-3α)[1] Ki: 30.75 nM (GSK-3α)[1] In Vitro: SB 415286 (SB-415286) inhibits human GSK-3α with an IC50 of 77.5 nM, and a Ki of 30.75 nM. SB-415286 stimulates glycogen synthesis in the Chang human liver cell line with EC50 of 2.9 μM. SB-415286 stimula…	21	12	57.1429	7	33.3333	2	9.52381	18	11	61.1111	4	22.2222	3	16.6667	14	9	64.2857	4	28.5714	1	7.14286	19	12	63.1579	4	21.0526	3	15.7895				72	3.14229	61.4244	5.73847	26.2949	4.67426	12.2807
H7-I	IC261	Casein Kinase;Casein Kinase	IC261 is a novel inhibitor of CK1, triggers the mitotic checkpoint control. The IC50 of IC261 for CK1 was 16 μM and for Cdk5 is 4.5 mM. IC50 value: 16 μM [2] Target: CK1 in vitro: IC261 is a specific inhibitor of the protein kinases casein kinase 1-delta and -epsilon, triggers the mitotic checkpoint and induces p53-dependent postmitotic effects. At low micromolar concentrations IC261 inhibits cyt…	31	3	9.67742	28	90.3226	0	0	28	3	10.7143	25	89.2857	0	0	29	3	10.3448	26	89.6552	0	0	34	6	17.6471	28	82.3529	0	0				122	3.72557	12.0959	3.72557	87.9041	0	0
F8-II	CX-4945	Autophagy;Casein Kinase;Casein Kinase	CX-4945 is an orally bioavailable, highly selective and potent CK2 inhibitor, with IC50 values of 1 nM against CK2α and CK2α'. IC50 & Target: IC50: 1 nM (CK2α), 1 nM (CK2α') In Vitro: CX-4945 causes cell-cycle arrest and selectively induced apoptosis in cancer cells relative to normal cells, attenuates PI3K/Akt signalingand, and the antiproliferative activity of CX-4945 is correlated with express…	26	1	3.84615	25	96.1538	0	0	25	0	0	25	100	0	0	19	1	5.26316	18	94.7368	0	0	23	3	13.0435	20	86.9565	0	0				93	5.47539	5.5382	5.47539	94.4618	0	0
H4-II	DMAT	Casein Kinase;Casein Kinase	DMAT is a potent and specific CK2 inhibitor with an IC50 value of 130 nM. IC50 & Target: IC50: 130 nM (CK2) In Vitro: DMAT (1 μM-2.5 μM) DMAT is more efficient in killing antiestrogen resistant cells than parental antiestrogen sensitive MCF-7 cells. DMAT-induced cell death of antiestrogen resistant cells is mediated by caspases. DMAT inhibits CK2 activity but the inhibition is similar in the thre…	34	6	17.6471	28	82.3529	0	0	27	6	22.2222	21	77.7778	0	0	23	4	17.3913	18	78.2609	1	4.34783	36	7	19.4444	29	80.5556	0	0				120	2.22668	19.1763	2.12373	79.7368	2.17391	1.08696
A10-I	Salinomycin	β-catenin;Bacterial;Autophagy;Wnt	Salinomycin is an inhibitor of Wnt/β-catenin signaling, which acts on the Wnt/Fzd/LRP complex. Salinomycin strongly suppresses Wnt1-stimulated reporter activity with an IC50 of 163 nM, and reduces β-catenin levels. IC50 & Target: IC50: 163 nM (Wnt1-stimulated reporter)[1] In Vitro: Salinomycin is a potent inhibitor of the Wnt signaling cascade. Incubation of the malignant lymphocytes with Salinom…	-	0	#VALUE!	0	#VALUE!	0	0	-	0	0	0	0	0	0	-	0	#VALUE!	0	#VALUE!	0	#VALUE!	-	0	#VALUE!	0	#VALUE!	0	#VALUE!				0	#VALUE!	#VALUE!	#VALUE!	#VALUE!	#VALUE!	#VALUE!
E9-I	Triptonide	β-catenin;Wnt	Triptonide(NSC 165677; PG 492), extracted from Tripterygium wilfordii Hook, inhibited the proliferation of mouse splenocytes induced by suboptimal concentration of concanavalin A or lipopolysaccharide at concentrations of 0.02, 0.1, and 0.5 mg/ml.	-	0	#VALUE!	0	#VALUE!	0	0	-	0	0	0	0	0	0	-	0	#VALUE!	0	#VALUE!	0	#VALUE!	-	0	#VALUE!	0	#VALUE!	0	#VALUE!				0	#VALUE!	#VALUE!	#VALUE!	#VALUE!	#VALUE!	#VALUE!
H4-I	NCB-0846	Wnt;MAP4K	NCB-0846 is an orally available TNIK inhibitor with an IC50 of 21 nM. IC50 & Target: IC50: 21 nM (NCB-0846)[1] In Vitro: NCB-0846 has anti-Wnt activity. NCB-0846 binds to TNIK in an inactive conformation, and this binding mode seems to be essential for Wnt inhibition. NCB-0846 shows inhibitory activity against TNIK with an IC50 of 21 nM. NCB-0846 also inhibits FLT3, JAK3, PDGFRα, TRKA, CDK2/CycA2…	-	0	#VALUE!	0	#VALUE!	0	0	-	0	0	0	0	0	0	-	0	#VALUE!	0	#VALUE!	0	#VALUE!	-	0	#VALUE!	0	#VALUE!	0	#VALUE!				0	#VALUE!	#VALUE!	#VALUE!	#VALUE!	#VALUE!	#VALUE!
B2-II	Pyrvinium pamoate	Wnt	Pyrvinium pamoate, a well-known anthelmintic drug, acts as a selective WNT pathway inhibitor. In Vitro: Pyrvinium pamoate (0-500 nM) inhibits proliferation of MCF-7 (luminal), MDA-MB-231 (claudin-low), MDA-MB-468 (basal-like) and SkBr3 (HER2-OE) cells in a dose-dependent manner, with IC50 value of 1170±105.0 nM against MDA-MB-231 cell line. Pyrvinium pamoate significantly inhibits self-renewal an…	-	0	#VALUE!	0	#VALUE!	0	0	-	0	0	0	0	0	0	-	0	#VALUE!	0	#VALUE!	0	#VALUE!	-	0	#VALUE!	0	#VALUE!	0	#VALUE!				0	#VALUE!	#VALUE!	#VALUE!	#VALUE!	#VALUE!	#VALUE!

## Sheet: Fig. 3C percentages
Figure 3C - Percentages of alveolar cell types in the WNT modulators screen
	Bipotent (SFTPC+/RAGE+)				AT1 (SFTPC-/RAGE+)				AT2 (SFTPC+/RAGE-)
	R1	R2	R3	R4	R1	R2	R3	R4	R1	R2	R3	R4
DMSO	47.0588	42.8571	40	32.1429	41.1765	52.381	55	67.8571	11.7647	4.7619	5	0
Emodin	56.5217	46.6667	45	56.5217	43.4783	53.3333	50	39.1304	0	0	5	4.34783
TTP 22	39.2857	34.7826	55	54.2857	50	65.2174	45	45.7143	10.7143	0	0	0
TDZD-8	22.7273	64.7059	35.7143	31.8182	68.1818	29.4118	57.1429	54.5455	9.09091	5.88235	7.14286	13.6364
AR-A014418	46.6667	34.2857	31.25	39.2857	46.6667	65.7143	62.5	60.7143	6.66667	0	6.25	0
TWS119	16	31.5789	36.8421	11.7647	84	68.421	63.1579	88.2353	0	0	0	0
IM-12	31.25	23.6842	36	30.4348	68.75	73.6842	60	60.8696	0	2.63158	4	8.69565
Tideglusib	54.5455	55.2632	51.7241	42.3077	45.4545	44.7368	48.2759	53.8462	0	0	0	3.84615
Bikinin	50	50	38.0952	54.1667	50	50	57.1429	45.8333	0	0	4.7619	0
WAY-262611	57.8947	38.4615	41.1765	45.4545	42.1053	61.5385	52.9412	50	0	0	5.88235	4.54545
PNU-74654	36.3636	27.7778	30	21.4286	54.5455	66.6667	55	71.4286	9.09091	5.55556	15	7.14286
Cardiogenol C (hydrochloride)	51.5151	29.0323	40	33.3333	39.3939	67.7419	60	66.6667	9.09091	3.22581	0	0
XAV-939	43.4783	50	41.4634	50	43.4783	43.75	51.2195	45	13.0435	6.25	7.31707	5
WIKI4	46.6667	52.2727	57.6923	51.5151	44.4444	40.9091	42.3077	48.4849	8.88889	6.81818	0	0
Nefopam (hydrochloride)	41.1765	48.2759	42.8571	46.6667	58.8235	51.7241	57.1429	53.3333	0	0	0	0
KYA1797K	34.7826	48.718	36	43.1818	65.2174	48.718	64	56.8182	0	2.5641	0	0
Berberine (chloride hydrate)	54.5455	6.25	10.7143	8.33333	45.4545	93.75	89.2857	91.6667	0	0	0	0
Pamidronic acid	41.6667	48.5714	57.1429	42.8571	54.1667	51.4286	42.8571	57.1429	4.16667	0	0	0
Wnt-C59	34.8837	44.4444	40	48	62.7907	50	57.1429	52	2.32558	5.55556	2.85714	0
KY02111	41.1765	45.4545	22.7273	47.3684	52.9412	54.5455	63.6364	47.3684	5.88235	0	13.6364	5.26316
iCRT 14	35.4167	65.5172	77.2727	35.2941	64.5833	34.4828	22.7273	64.7059	0	0	0	0
ETC-159	35.2941	30.7692	40	40.9091	64.7059	69.2308	60	54.5455	0	0	0	4.54545
IWR-1	40.7407	40	57.8947	47.6191	29.6296	40	42.1053	52.3809	29.6296	20	0	0
Hexachlorophene	20	31.25	41.6667	25.8065	80	68.75	58.3333	74.1936	0	0	0	0
iCRT3	45.4545	36.3636	36	36	54.5455	59.0909	64	64	0	4.54545	0	0
JW74	35.4839	37.5	45	64	61.2903	62.5	55	36	3.22581	0	0	0
LGK974	47.0588	92.3077	12.5	45	52.9412	7.69231	87.5	55	0	0	0	0
IWP L6	20	23.3333	55.5556	45	80	63.3333	25.9259	35	0	13.3333	18.5185	20
TA-01	29.0323	75	65.2174	46.1538	58.0645	20	34.7826	53.8462	12.9032	5	0	0
D4476	48.7805	50	63.6364	77.4194	51.2195	41.6667	31.8182	22.5806	0	8.33333	4.54545	0
LF3	65.2174	57.1429	46.1538	54.1667	30.4348	39.2857	38.4615	33.3333	4.34783	3.57143	15.3846	12.5
IWP-2	73.3333	56.6667	48.2759	50	26.6667	43.3333	51.7241	50	0	0	0	0
CHIR-99021	62.069	59.0909	68.1818	70	37.931	40.9091	31.8182	30	0	0	0	0
SB 216763	94.1176	86.6667	72	56.25	5.88235	13.3333	28	43.75	0	0	0	0
LY2090314	75	62.963	82.7586	59.375	17.5	25.9259	10.3448	31.25	7.5	11.1111	6.89655	9.375
AZD2858	78.5714	73.3333	80	72.7273	21.4286	26.6667	12	15.1515	0	0	8	12.1212
Wogonin	66.6667	68.75	52	76.1905	27.7778	31.25	48	23.8095	5.55556	0	0	0
SB 415286	57.1429	61.1111	64.2857	63.1579	33.3333	22.2222	28.5714	21.0526	9.52381	16.6667	7.14286	15.7895
IC261	9.67742	10.7143	10.3448	17.6471	90.3226	89.2857	89.6552	82.3529	0	0	0	0
CX-4945	3.84615	0	5.26316	13.0435	96.1539	100	94.7368	86.9565	0	0	0	0
DMAT	17.6471	22.2222	17.3913	19.4444	82.3529	77.7778	78.2609	80.5556	0	0	4.34783	0
Salinomycin	0	0	0	0	0	0	0	0	0	0	0	0
Triptonide	0	0	0	0	0	0	0	0	0	0	0	0
NCB-0846	0	0	0	0	0	0	0	0	0	0	0	0
Pyrvinium pamoate	0	0	0	0	0	0	0	0	0	0	0	0
