# Supplementary material for: Differentiation of mouse fetal lung alveolar progenitors in serum-free organotypic cultures
Source: eLife. 2021 Sep 29;10:e65811. doi: 10.7554/eLife.65811 (PMC8480975; doi:10.7554/eLife.65811)
Supplement: Figure 4—source data 1. [file elife-65811-fig4-data1.xlsx]

## Sheet: Fig. 4A
Figure 4A - Normalized expression values of AT2 cell markers, CK inhibitors vs. DMSO control
	DMSO	DMSO	DMSO	TTP22	TTP22	TTP22	Emodin	Emodin	Emodin	IC261	IC261	IC261	CX-4945	CX-4945	CX-4945	DMAT	DMAT	DMAT
Sftpc	1.10592	0.986403	0.907676	1.2616	0.952802	1.01766	1.00364	0.88592	0.898287	0.12943	0.175586	0.150752	0.471474	0.291234	0.352391	0.156068	0.177421	0.107712
Abca3	0.967907	1.11957	0.912527	1.11569	1.39275	1.65627	1.01956	1.01603	1.48755	0.469091	0.348188	0.283799	0.689174	0.102446	0.448425	0.674991	0.851418	0.473994
Lyz2	0.8948	1.10545	0.999748	1.29436	1.26334	1.69612	0.739507	0.861329	0.882481	0.157917	0.229607	0.178283	0.387492	0.168666	0.277823	0.274949	0.382157	0.199193
Cebpa	0.952807	0.898291	1.1489	0.858718	1.01766	0.926752	0.849835	0.809586	1.31974	0.826597	0.617819	0.327656	0.517724	0.00451911	0.456997	0.244051	0.460175	0.176808
Scnna1	1.26382	0.791571	0.94461	1.18739	1.26821	1.7627	0.860228	0.780673	1.04087	0.302036	0.384963	0.355468	0.169316	0.0269754	0.159076	0.297877	0.386299	0.273155

## Sheet: Fig. 4B
Figure 4B - Normalized Axin2 expression values, CK inhibitors vs. DMSO control
DMSO	TTP22	Emodin	IC261	CX4945	DMAT
1.18325	0.462575	0.642942	0.26	0.478888	0.470661
1.0926	1.03366	1.04446	0.72	0.775264	0.518624
0.887463	0.552007	0.698707	0.09	0.220333	0.430105
0.836687	0.583482	0.816633		0.487259	0.460975
0.93
Figure 4B - Statistics: one-way ANOVA multiple comparisons
ANOVA summary
F	5.515
P value	0.003
P value summary	**
Significant diff. among means (P < 0.05)?	Yes
R squared	0.6051
Brown-Forsythe test
F (DFn, DFd)	0,6041 (5, 18)
P value	0.6977
P value summary	ns
Are SDs significantly different (P < 0.05)?	No
Bartlett's test
Bartlett's statistic (corrected)
P value
P value summary
Are SDs significantly different (P < 0.05)?
ANOVA table	SS	DF	MS	F (DFn, DFd)	P value
Treatment (between columns)	1.145	5	0.229	F (5, 18) = 5,515	P=0,0030
Residual (within columns)	0.7472	18	0.04151
Total	1.892	23
Data summary
Number of treatments (columns)	6
Number of values (total)	24
Number of families	1
Number of comparisons per family	15
Alpha	0.05
Tukey's multiple comparisons test	Mean Diff,	95,00% CI of diff,	Significant?	Summary	Adjusted P Value
DMSO vs. TTP22	0.3281	-0,1063 to 0,7624	No	ns	0.2077	A-B
DMSO vs. Emodin	0.1853	-0,2490 to 0,6197	No	ns	0.7513	A-C
DMSO vs. IC261	0.6293	0,1565 to 1,102	Yes	**	0.0057	A-D
DMSO vs. CX-4945	0.4956	0,06121 to 0,9299	Yes	*	0.0202	A-E
DMSO vs. DMAT	0.5159	0,08155 to 0,9503	Yes	*	0.0148	A-F
TTP22 vs. Emodin	-0.1428	-0,6006 to 0,3151	No	ns	0.915	B-C
TTP22 vs. IC261	0.3013	-0,1933 to 0,7958	No	ns	0.4136	B-D
TTP22 vs. CX-4945	0.1675	-0,2904 to 0,6253	No	ns	0.8484	B-E
TTP22 vs. DMAT	0.1878	-0,2700 to 0,6457	No	ns	0.7793	B-F
Emodin vs. IC261	0.444	-0,05052 to 0,9386	No	ns	0.0934	C-D
Emodin vs. CX-4945	0.3103	-0,1476 to 0,7681	No	ns	0.3055	C-E
Emodin vs. DMAT	0.3306	-0,1273 to 0,7884	No	ns	0.2462	C-F
IC261 vs. CX-4945	-0.1338	-0,6283 to 0,3608	No	ns	0.9514	D-E
IC261 vs. DMAT	-0.1134	-0,6080 to 0,3811	No	ns	0.9756	D-F
CX-4945 vs. DMAT	0.02034	-0,4375 to 0,4782	No	ns	>0,9999	E-F
Test details	Mean 1	Mean 2	Mean Diff,	SE of diff,	n1	n2	q	DF
DMSO vs. TTP22	0.986	0.6579	0.3281	0.1367	5	4	3.395	18
DMSO vs. Emodin	0.986	0.8007	0.1853	0.1367	5	4	1.917	18
DMSO vs. IC261	0.986	0.3567	0.6293	0.1488	5	3	5.982	18
DMSO vs. CX-4945	0.986	0.4904	0.4956	0.1367	5	4	5.128	18
DMSO vs. DMAT	0.986	0.4701	0.5159	0.1367	5	4	5.338	18
TTP22 vs. Emodin	0.6579	0.8007	-0.1428	0.1441	4	4	1.401	18
TTP22 vs. IC261	0.6579	0.3567	0.3013	0.1556	4	3	2.738	18
TTP22 vs. CX-4945	0.6579	0.4904	0.1675	0.1441	4	4	1.644	18
TTP22 vs. DMAT	0.6579	0.4701	0.1878	0.1441	4	4	1.844	18
Emodin vs. IC261	0.8007	0.3567	0.444	0.1556	4	3	4.035	18
Emodin vs. CX-4945	0.8007	0.4904	0.3103	0.1441	4	4	3.045	18
Emodin vs. DMAT	0.8007	0.4701	0.3306	0.1441	4	4	3.245	18
IC261 vs. CX-4945	0.3567	0.4904	-0.1338	0.1556	3	4	1.216	18
IC261 vs. DMAT	0.3567	0.4701	-0.1134	0.1556	3	4	1.031	18
CX-4945 vs. DMAT	0.4904	0.4701	0.02034	0.1441	4	4	0.1997	18

## Sheet: Fig. 4C Raw data
Figure 4C - Raw luciferase data, replica 1
	WNT3A	+	+	+	+	+	+	+	-
	Chemical compound	DMSO	IC261	CX-4945	DMAT	Emodin	TTP22	IWR-1	DMSO
		Firefly
		Raw Data (lens)
		1	2	3	4	5	6	7	8	9	10	11	12
TOP	A	1450000	260490	33480	215305	113387	245629	108965	28044
TOP	B	918010	250035	39113	211520	239328	504237	98281	26521
TOP	C	1599000	402428	35115	412734	206431	475403	159619	9158
FOP	D	144248	104801	49370	50628	59746	117276	116815	114611
FOP	E	148980	82254	52523	42464	45127	79745	96728	108760
FOP	F	108977	80666	58833	46434	37048	66342	103989	99822
	G
	H
		Renilla
		Raw Data (lens)
		1	2	3	4	5	6	7	8	9	10	11	12
TOP	A	1368000	463203	188077	338032	118929	602586	574731	782729
TOP	B	687341	314604	142936	233405	181300	489440	408256	569789
TOP	C	1057000	467955	140664	412523	128058	414816	581835	157999
FOP	D	1505000	748572	239663	636282	256741	1043000	1134000	1158000
FOP	E	1508000	629279	227176	531385	172283	817452	880026	1049000
FOP	F	1067000	552553	199351	470428	118320	614012	856515	924326
	G
	H
Figure 4C - Raw luciferase data, replica 2
	WNT3A	-	+	+	+	+	+	+	+
	Chemical compound	DMSO	DMSO	IWR-1	IC261	CX-4945	DMAT	Emodin	TTP22
		Firefly
		Raw Data (lens)
		1	2	3	4	5	6	7	8	9	10	11	12
TOP	A	16112	480537	112060	185828	26678	121451	56055	283612
TOP	B	7327	428715	84426	134283	26912	165923	49581	226735
TOP	C	9559	413528	68046	101527	30284	126671	72277	216802
FOP	D	50021	78380	99632	77224	90410	62423	66448	67978
FOP	E	82273	70205	95128	53749	89275	51890	67344	54755
FOP	F	67815	69942	93210	58224	81888	41241	72854	26259
	G
	H
		Renilla
		Raw Data (lens)
		1	2	3	4	5	6	7	8	9	10	11	12
TOP	A	173268	193401	228014	195376	82136	102714	44875	166021
TOP	B	90940	178651	217104	141500	86569	131070	36920	100101
TOP	C	92221	143237	137804	124389	58815	102243	52173	118164
FOP	D	485188	822878	898907	698336	337099	554022	268499	609070
FOP	E	666999	697673	839416	482478	295007	429691	249649	466353
FOP	F	514283	556504	665283	422914	237755	295424	231617	232657
	G
	H
Figure 4C - Raw luciferase data, replica 3
	WNT3A	-	+	+	+	+	+	+	+
	Chemical compound	DMSO	DMSO	IWR-1	IC261	CX-4945	DMAT	Emodin	TTP22
		Firefly
		Raw Data (lens)
		1	2	3	4	5	6	7	8	9	10	11	12
TOP	A	47236	1443000	312951	388407	93710	637708	591297	1032000
TOP	B	47390	1633000	294389	411923	75630	631527	437307	1097000
TOP	C	42809	1503000	354163	363307	39600	506274	434232	822335
FOP	D	73030	55424	69811	72665	79936	57521	63326	91085
FOP	E	74110	73873	75950	53057	75296	49167	54764	89976
FOP	F	60106	57745	70726	49464	67553	35590	47900	61343
	G
	H
		Renilla
		Raw Data (lens)
		1	2	3	4	5	6	7	8	9	10	11	12
TOP	A	485892	526609	489186	325848	190380	307919	171098	405506
TOP	B	424188	495844	383928	335228	163077	264839	121053	391869
TOP	C	376622	376683	378953	264391	75369	207362	101559	280790
FOP	D	702642	520000	636118	562060	291736	490246	205597	697480
FOP	E	649574	717706	643268	422327	265290	422409	175868	637766
FOP	F	492185	529148	538332	364830	223952	270759	139372	430069
	G
	H

## Sheet: Fig. 4C Statistics
Figure 4C - Normalized luciferase values
DMSO	WNT3A	IWR-1	IC261	CX-4945	DMAT	Emodin	TTP22
1	29.1516	4.66549	11.7777	2.1198	21.8086	10.6478	17.9843
1	31.238	4.87582	9.76196	1.62489	12.7761	6.18067	21.9582
1	33.1684	6.87217	10.2468	1.81739	19.9145	12.4196	21.0545
Figure 4C - Statistics: one-way ANOVA multiple comparisons
ANOVA summary
F	58.25
P value	<0,0001
P value summary	****
Significant diff. among means (P < 0.05)?	Yes
R squared	0.9622
Brown-Forsythe test
F (DFn, DFd)	0,9949 (7, 16)
P value	0.4694
P value summary	ns
Are SDs significantly different (P < 0.05)?	No
Bartlett's test
Bartlett's statistic (corrected)
P value
P value summary
Are SDs significantly different (P < 0.05)?
ANOVA table	SS	DF	MS	F (DFn, DFd)	P value
Treatment (between columns)	2245	7	320.8	F (7, 16) = 58,25	P<0,0001
Residual (within columns)	88.1	16	5.506
Total	2334	23
Data summary
Number of treatments (columns)	8
Number of values (total)	24
Tukey's multiple comparisons test	Mean Diff,	95,00% CI of diff,	Significant?	Summary	Adjusted P Value
DMSO vs. WNT3A	-30.19	-36,82 to -23,55	Yes	****	<0,0001	A-B
DMSO vs. IWR-1	-4.471	-11,10 to 2,162	No	ns	0.3342	A-C
DMSO vs. IC261	-9.595	-16,23 to -2,962	Yes	**	0.0025	A-D
DMSO vs. CX-4945	-0.854	-7,487 to 5,779	No	ns	0.9998	A-E
DMSO vs. DMAT	-17.17	-23,80 to -10,53	Yes	****	<0,0001	A-F
DMSO vs. Emodin	-8.749	-15,38 to -2,116	Yes	**	0.0059	A-G
DMSO vs. TTP22	-19.33	-25,97 to -12,70	Yes	****	<0,0001	A-H
WNT3A vs. IWR-1	25.71	19,08 to 32,35	Yes	****	<0,0001	B-C
WNT3A vs. IC261	20.59	13,96 to 27,22	Yes	****	<0,0001	B-D
WNT3A vs. CX-4945	29.33	22,70 to 35,97	Yes	****	<0,0001	B-E
WNT3A vs. DMAT	13.02	6,386 to 19,65	Yes	****	<0,0001	B-F
WNT3A vs. Emodin	21.44	14,80 to 28,07	Yes	****	<0,0001	B-G
WNT3A vs. TTP22	10.85	4,220 to 17,49	Yes	***	0.0007	B-H
IWR-1 vs. IC261	-5.124	-11,76 to 1,509	No	ns	0.1999	C-D
IWR-1 vs. CX-4945	3.617	-3,016 to 10,25	No	ns	0.5765	C-E
IWR-1 vs. DMAT	-12.7	-19,33 to -6,062	Yes	***	0.0001	C-F
IWR-1 vs. Emodin	-4.278	-10,91 to 2,355	No	ns	0.3833	C-G
IWR-1 vs. TTP22	-14.86	-21,49 to -8,228	Yes	****	<0,0001	C-H
IC261 vs. CX-4945	8.741	2,108 to 15,37	Yes	**	0.006	D-E
IC261 vs. DMAT	-7.571	-14,20 to -0,9375	Yes	*	0.0196	D-F
IC261 vs. Emodin	0.8461	-5,787 to 7,480	No	ns	0.9998	D-G
IC261 vs. TTP22	-9.737	-16,37 to -3,103	Yes	**	0.0022	D-H
CX-4945 vs. DMAT	-16.31	-22,95 to -9,679	Yes	****	<0,0001	E-F
CX-4945 vs. Emodin	-7.895	-14,53 to -1,262	Yes	*	0.0141	E-G
CX-4945 vs. TTP22	-18.48	-25,11 to -11,84	Yes	****	<0,0001	E-H
DMAT vs. Emodin	8.417	1,784 to 15,05	Yes	**	0.0083	F-G
DMAT vs. TTP22	-2.166	-8,799 to 4,468	No	ns	0.9402	F-H
Emodin vs. TTP22	-10.58	-17,22 to -3,950	Yes	***	0.0009	G-H
Test details	Mean 1	Mean 2	Mean Diff,	SE of diff,	n1	n2	q	DF
DMSO vs. WNT3A	1	31.19	-30.19	1.916	3	3	22.28	16
DMSO vs. IWR-1	1	5.471	-4.471	1.916	3	3	3.3	16
DMSO vs. IC261	1	10.6	-9.595	1.916	3	3	7.083	16
DMSO vs. CX-4945	1	1.854	-0.854	1.916	3	3	0.6304	16
DMSO vs. DMAT	1	18.17	-17.17	1.916	3	3	12.67	16
DMSO vs. Emodin	1	9.749	-8.749	1.916	3	3	6.458	16
DMSO vs. TTP22	1	20.33	-19.33	1.916	3	3	14.27	16
WNT3A vs. IWR-1	31.19	5.471	25.71	1.916	3	3	18.98	16
WNT3A vs. IC261	31.19	10.6	20.59	1.916	3	3	15.2	16
WNT3A vs. CX-4945	31.19	1.854	29.33	1.916	3	3	21.65	16
WNT3A vs. DMAT	31.19	18.17	13.02	1.916	3	3	9.61	16
WNT3A vs. Emodin	31.19	9.749	21.44	1.916	3	3	15.82	16
WNT3A vs. TTP22	31.19	20.33	10.85	1.916	3	3	8.011	16
IWR-1 vs. IC261	5.471	10.6	-5.124	1.916	3	3	3.782	16
IWR-1 vs. CX-4945	5.471	1.854	3.617	1.916	3	3	2.67	16
IWR-1 vs. DMAT	5.471	18.17	-12.7	1.916	3	3	9.371	16
IWR-1 vs. Emodin	5.471	9.749	-4.278	1.916	3	3	3.158	16
IWR-1 vs. TTP22	5.471	20.33	-14.86	1.916	3	3	10.97	16
IC261 vs. CX-4945	10.6	1.854	8.741	1.916	3	3	6.452	16
IC261 vs. DMAT	10.6	18.17	-7.571	1.916	3	3	5.588	16
IC261 vs. Emodin	10.6	9.749	0.8461	1.916	3	3	0.6245	16
IC261 vs. TTP22	10.6	20.33	-9.737	1.916	3	3	7.187	16
CX-4945 vs. DMAT	1.854	18.17	-16.31	1.916	3	3	12.04	16
CX-4945 vs. Emodin	1.854	9.749	-7.895	1.916	3	3	5.828	16
CX-4945 vs. TTP22	1.854	20.33	-18.48	1.916	3	3	13.64	16
DMAT vs. Emodin	18.17	9.749	8.417	1.916	3	3	6.213	16
DMAT vs. TTP22	18.17	20.33	-2.166	1.916	3	3	1.599	16
Emodin vs. TTP22	9.749	20.33	-10.58	1.916	3	3	7.811	16
